# Supplementary material for: Linking Adverse Childhood Experiences and Chronic Lung Diseases: The Mediating Role of Depression, Frailty, and Social Isolation
Source: Research Square preprint supplement (doi:10.21203/rs.3.rs-7514546/v1), 2025-09-23
Supplement: Supplementary file 1 [file ce52de900f7b25daf0f68847.docx]

**Table 1 Sociodemographic differences between CLD (*N* = 17496)**

| **Variables** | **Total** | **Number of CLD** | |  | ***p*** |
| --- | --- | --- | --- | --- | --- |
| No(*n* = 15715) | Yes(*n* = 1781) | ***X2/t*** |
| **Age Mean (SD)** | 59.0(10.1) | 58.6(10.0) | 62.7(10.3) | -6.828 | < 0.001 |
| **Gender** n % |  |  |  | 38.832 | < 0.001 |
| Male | 6771(47.2) | 5972(46.3) | 799(54.9) |  |  |
| Female | 7579 (52.8) | 6924(53.7) | 655(45.1) |  |  |
| **Education** n % |  |  |  | 32.315 | < 0.001 |
| Middle school or below | 15255 (87.3) | 13635(86.9) | 1620(91.2) |  |  |
| High school | 1366(7.8) | 1286(8.2) | 80(4.5) |  |  |
| College/university or above | 849(4.9) | 772(4.9) | 77(4.3) |  |  |
| **Smoking** n % |  |  |  | 124.345 | < 0.001 |
| Yes | 6902(39.5) | 5981(38.1) | 921(51.8) |  |  |
| No | 10574(60.5) | 9716(61.9) | 858(48.2) |  |  |
| **Drinking *n*** *%* |  |  |  | 4.568 | 0.102 |
| Drink more than once a month | 4365(25.0) | 3924(25.0) | 441(24.8) |  |  |
| Drink but less than once a month | 1377(7.9) | 1259(8.0) | 118(6.6) |  |  |
| None of these | 11728(67.1) | 10508(67.0) | 1220(68.6) |  |  |
| **Adverse childhood experiences *n*** *%* |  |  |  | 8.099 | 0.004 |
| Yes | 3793(48.9) | 3344(48.3) | 449(53.6) |  |  |
| No | 3967(51.1) | 3578(51.7) | 389(46.4) |  |  |
| **Frailty** **Mean (SD)** | 0.252(0.102) | 0.249(0.102) | 0.276(0.102) | -6.780 | <0.001 |
| **Social isolation Mean (SD)** | 1.8(0.7) | 1.7.(0.7) | 1.8(0.7) | -1.565 | 0.118 |
| **Depression Mean (SD)** | 10.0(4.9) | 9.9(4.9) | 11.4(5.2) | -5.310 | <0.001 |

*Notes*. CLD: chronic lung disease

**Table 2** **Descriptive statistics and correlations of ACEs, Frailty, Social isolation, Depression, CLD and sociodemographic characteristics** **(*N* = 17496).**

|  |  | **Mean** | **SD** | **1** | **2** | **3** | **4** | **5** | **6** | **7** | **8** | **9** | **10** |
| --- | --- | --- | --- | --- | --- | --- | --- | --- | --- | --- | --- | --- | --- |
| **1** | **Age** | **59.045** | **10.148** | **1** |  |  |  |  |  |  |  |  |  |
| **2** | **gender** | **1.528** | **0.499** | **- 0.069**** | **1** |  |  |  |  |  |  |  |  |
| **3** | **Education** | **1.175** | **0.491** | **- 0.140**** | **- 0.124**** | **1** |  |  |  |  |  |  |  |
| **4** | **Smoking** | **1.605** | **0.488** | **- 0.069**** | **0.677**** | **- 0.030**** | **1** |  |  |  |  |  |  |
| **5** | **Drinking** | **2.421** | **0.862** | **0.050**** | **0.484**** | **- 0.075**** | **0.415**** | **1** |  |  |  |  |  |
| **6** | **ACEs** | **0.489** | **0.499** | **0.010** | **0.124**** | **- 0.101**** | **0.076**** | **0.049**** | **1** |  |  |  |  |
| **7** | **frailty** | **0.252** | **0.102** | **0.039**** | **0.020** | **0.062**** | **0.011** | **0.059**** | **- 0.006** | **1** |  |  |  |
| **8** | **social isolation** | **1.751** | **0.699** | **0.099**** | **0.069**** | **- 0.070**** | **0.031*** | **0.039**** | **0.100**** | **- 0.029*** | **1** |  |  |
| **9** | **Depression** | **10.004** | **4.872** | **0.045**** | **0.166**** | **- 0.115**** | **0.085**** | **0.091**** | **0.140**** | **0.186**** | **0.084**** | **1** |  |
| **10** | **CLD** | **0.108** | **0.302** | **0.122**** | **- 0.052**** | **- 0.038**** | **-0.085**** | **0.008** | **0.033*** | **0.087**** | **0.026*** | **0.092**** | **1** |

*Note.* SD, standard deviation. **p* < .05, ****p* < .001. ACEs, Adverse childhood experience; CLD, chronic lung disease.

**Table 3 Standardized effects of ACEs on CLD through social isolation, depression and frailty (*N* = 17496)**

|  |  | **B** | **95%CI** | | **β** | **SE** | **CR** | ***p*** |
| --- | --- | --- | --- | --- | --- | --- | --- | --- |
|  | **ACEs → Depression → CLD** | **0.006** | **0.004** | **0.008** | **0.009** | **0.001** | **5.294** | **< 0.001** |
|  | ACEs **→** Social isolation **→** CLD | < 0.001 | - 0.001 | 0.002 | < 0.001 | 0.001 | 0.242 | 0.809 |
|  | **ACEs → Depression → Frailty → CLD** | **0.001** | **< 0.001** | **0.001** | **0.001** | **< 0.001** | **3.881** | **< 0.001** |
|  | ACEs **→** Depression **→** Social isolation **→** CLD | < 0.001 | < 0.001 | < 0.001 | < 0.001 | < 0.001 | 0.242 | 0.809 |
|  | **ACEs → Social isolation → Frailty → CLD** | **< 0.001** | **< 0.001** | **< 0.001** | **< 0.001** | **< 0.001** | **- 2.489** | **0.013** |
|  | **ACEs → Depression → Frailty → Social isolation → CLD** | **< 0.001** | **< 0.001** | **< 0.001** | **< 0.001** | **< 0.001** | **- 2.256** | **0.024** |
|  | **Total Indirect** | **0.007** | **0.004** | **0.009** | **0.011** | **0.001** | **5.052** | **< 0.001** |
|  | **Total Direct** | **0.015** | **0.001** | **0.029** | **0.024** | **0.007** | **2.072** | **0.038** |
|  | **Total Effect** | **0.021** | **0.007** | **0.035** | **0.034** | **0.007** | **3.017** | **0.003** |

*Note. CR*, *critical ratio*; *SE*, standard error;ACEs, Adverse childhood experience; CLD, chronic lung disease.
